# Supplementary material
Source: MDPI journal article supplement (https://www.mdpi.com/2075-5309/14/4/953)
Supplement: s1 [file s1]

## **SUPPLEMENTARY MATERIAL A – List of Software Reviewed for the Determination of System Functions in the Proposed Prototype**

- [70] (S1) Palisade @Risk. 2023. Available online: <https://palisade.lumivero.com/> (accessed on 10 September 2023)
- [65] (S2) A1 Tracker; Available online: <https://www.a1enterprise.com/enterprise-risk-management-software/> (accessed on 10 September 2023)
- [72] (S3) Active Risk Manager. 2023. Available online: <https://riskconnect.com/solutions/active-risk-manager/> (accessed on 10 September 2023)
- [67] (S4) Aperitisoft. 2023. Available online: <https://rpm3solutions.com/software/> (accessed on 10 September 2023)
- [73] (S5) Aptien. 2023. Available online: <https://aptien.com/en/risk-management> (accessed on 10 September 2023)
- [74] (S6) Auditboard. 2023 Available online: <https://www.auditboard.com/solutions/risk/> (accessed on 10 September 2023)
- [75] (S7) Auditcomply; 2023. Available online: <https://www.auditcomply.com/business-area/enterprise%20-risk-management/> (accessed on 10 September 2023)
- [76] (S8) Barnowl; 2023. Available online: <https://barnowl.co.za/risk-management-software/> (accessed on 10 September 2023)
- [77] (S9) Corporater; 2023. Available online: <https://corporater.com/solutions/risk-management/> (accessed on 10 September 2023)
- [78] (S10) Decision Time; 2023. Available online: <https://www.decisiontime.co.uk/board-and-risk-management-software/risk-register-software>
- [79] (S11) ERM Essential; 2023. Available online: [https://info.gartnerdigitalmarkets.com/tracker-networks-gdmlp/?category=ERM&utm\\_source=capterra](https://info.gartnerdigitalmarkets.com/tracker-networks-gdmlp/?category=ERM&utm_source=capterra)
- [66] (S12) Execview; 2023. Available online: <https://execview.com/product/> (accessed on 10 September 2023)
- [133] (S13) Goat; 2023. Available online: <https://goatriskolutions.com/our-product/> (accessed on 10 September 2023)
- [80] (S14) Hyperproof; 2023. Available online: <https://hyperproof.io/product/#risk-management> (accessed on 10 September 2023)
- [71] (S15) Risky Project Professional; 2023. Available online: <https://intaver.com/products/riskyproject-professional/> (accessed on 10 September 2023)
- [81] (S16) iRisk; 2023. Available online: <https://www.valgenesis.com/product/valgenesis-irisk> (accessed on 10 September 2023)
- [82] (S17) JCAD Core; 2023. Available online: <https://www.jcad.co.uk/jcad-products/risk-management-software/overview/> (accessed on 10 September 2023)
- [83] (S18) Logic Manager; 2023. Available online: <https://www.logicmanager.com/> (accessed on 10 September 2023)
- [84] (S19) Mango; 2023. Available online: <https://www.mangolive.com/risk-management-software-qhse-compliance> (accessed on 10 September 2023)
- [85] (S20) nTask Manager; 2023. Available online: <https://www.ntaskmanager.com/product/risk-management-software/> (accessed on 10 September 2023)
- [86] (S21) Optial Smart; 2023. Available online: <https://www.optial.com/risk-management> (accessed on 10 September 2023)
- [87] (S22) Omega 365 Pims Risk Management; 2023. Available online: <https://omega365.com/products/risk-management> (accessed on 10 September 2023)
- [88] (S23) Pirani Riskment Suite; 2023. Available online: <https://www.piranirisk.com/en/solutions/operational-risk-management-software> (accessed on 10 September 2023)
- [69] (S24) Project Risk Manager; 2023. Available online: <https://www.project-risk-manager.com/software/#features-block> (accessed on 10 September 2023)
- [68] (S25) SAP Risk Management; 2023. Available online: <https://www.sap.com/turkey/products/financialmanagement/risk-management.html> (accessed on 10 September 2023)
- [89] (S26) Sectera; 2023. Available online: <https://sectara.com/> (accessed on 10 September 2023)
- [90] (S27) Symbiant; 2023. Available online: <https://www.symbiant.co.uk/solutions/risk-management-software/> (accessed on 10 September 2023)
- [91] (S28) Dmaze; 2023. Available online: <https://www.dmaze.com/> (accessed on 10 September 2023)

**SUPPLEMENTARY MATERIAL B – PPP Risk Factors Used in the Proposed Prototype (Adapted from Authors [92])**

**\*Risk factors that are integrated into the model after expert validation via Delphi Technique**

| <b>-LAND RISKS-</b>                                 | 1 | 2 | 3 | 4 | 5 | 6 | 7 | 8 | 9 | 10 | 11 | 12 | 13 | 14 | 15 | 16 | #  |
|-----------------------------------------------------|---|---|---|---|---|---|---|---|---|----|----|----|----|----|----|----|----|
| <b>Initial Land Approval Risks (Pre-contract) *</b> |   |   |   |   |   | x | x |   |   |    |    |    |    | x  |    |    | 3  |
| <b>Future Land Approval Risks (Post-contract) *</b> |   |   |   |   |   |   |   |   |   |    |    |    |    | x  |    |    | 1  |
| <b>Land Availability/Acquisition Risks*</b>         |   | x | x |   |   | x |   | x |   |    | x  |    |    | x  |    |    | 6  |
| <b>Land Acquisition Delay*</b>                      |   |   |   |   |   |   |   |   |   |    |    | x  | x  | x  |    |    | 3  |
| <b>Additional Land Need Risk*</b>                   |   |   |   |   |   |   |   |   |   |    |    |    |    | x  |    |    | 1  |
| <b>Heritage/Indigenous Rights*</b>                  |   |   |   | x |   |   |   |   | x |    |    |    | x  | x  |    |    | 4  |
| <b>Site Security Risks*</b>                         |   |   |   |   |   |   |   |   |   |    |    |    |    | x  |    |    | 1  |
| <b>Site Access Risk*</b>                            |   |   |   |   |   |   |   |   |   |    |    |    |    | x  |    |    | 1  |
| <b>Site Condition/Inappropriate Land*</b>           |   | x | x | x |   |   |   | x |   | x  |    |    |    | x  |    |    | 6  |
| <b>Utility Risks *</b>                              |   |   |   |   |   |   |   |   |   |    | x  |    | x  | x  | x  |    | 4  |
| <b>Findings on Site (e.g. Archaeological) *</b>     |   |   |   |   |   |   |   |   | x |    |    |    |    | x  |    |    | 2  |
| Munition/Mine/Bomb on Site                          |   |   |   |   |   |   |   |   |   |    |    |    |    | x  |    |    | 1  |
| <b>Polluted Site *</b>                              |   |   |   |   |   |   |   |   |   |    |    |    |    | x  |    |    | 1  |
| <b>Available/Existing Asset Related Risks*</b>      |   |   |   |   |   |   |   | x |   |    |    |    |    | x  |    |    | 2  |
| <b>-FINANCIAL RISKS-</b>                            | 1 | 2 | 3 | 4 | 5 | 6 | 7 | 8 | 9 | 10 | 11 | 12 | 13 | 14 | 15 | 16 | #  |
| <b>Finance Source Unavailability*</b>               | x | x |   |   | x | x | x | x |   | x  | x  |    |    |    | x  |    | 9  |
| <b>Financial Close Delay*</b>                       |   |   |   |   |   |   |   |   |   | x  |    |    |    |    |    |    | 1  |
| <b>Inflation *</b>                                  | x | x | x | x |   | x | x | x | x | x  | x  | x  | x  | x  |    |    | 13 |
| <b>Exchange Rate Risk*</b>                          |   | x | x |   |   | x | x |   | x | x  | x  | x  |    | x  |    |    | 9  |
| <b>Interest Rate Risk*</b>                          | x | x | x | x |   | x | x | x | x | x  | x  | x  |    | x  | x  |    | 13 |
| <b>Credit Risks*</b>                                |   | x |   |   |   |   |   |   | x |    |    |    |    |    |    |    | 2  |
| <b>Refinancing Risk*</b>                            |   |   |   |   |   |   |   |   |   |    | x  |    |    | x  |    |    | 2  |
| <b>Monetary Policy Radical Changes *</b>            |   |   | x |   |   |   |   |   |   |    |    |    |    |    |    |    | 1  |
| <b>Tax Change*</b>                                  | x | x | x | x |   | x |   | x |   | x  |    | x  | x  | x  |    |    | 10 |
| Economic Conjuncture                                | x | x |   |   |   |   |   |   |   |    | x  |    |    |    |    |    | 3  |
| <b>Economic Sabotage/Sanctions*</b>                 |   |   |   |   |   |   |   |   |   |    |    |    | x  |    |    |    | 1  |
| <b>Revenue Risk*</b>                                | x | x |   | x |   |   |   |   | x |    |    |    |    |    | x  |    | 5  |
| Low Rate of Return                                  |   | x |   |   |   |   |   |   |   |    |    |    |    |    |    |    | 1  |
| <b>Treasury guarantee risk*</b>                     |   |   |   |   |   |   |   |   |   |    |    |    |    |    |    | x  | 1  |
| <b>Uninsurable Events *</b>                         |   |   |   |   |   |   |   |   |   |    |    |    |    | x  |    |    | 1  |
| Currency Convertibility Risk                        |   |   |   |   |   |   |   |   |   |    | x  |    |    |    |    |    | 1  |
| <b>-LEGAL AND CONTRACTUAL RISKS-</b>                | 1 | 2 | 3 | 4 | 5 | 6 | 7 | 8 | 9 | 10 | 11 | 12 | 13 | 14 | 15 | 16 | #  |
| Partnership Formation-related Risk                  |   |   |   |   |   |   |   |   |   |    |    |    |    |    |    | x  | 1  |
| <b>Imperfect Legal/Law System*</b>                  |   |   |   |   |   |   | x | x |   |    |    |    |    |    | x  |    | 3  |
| <b>Regulatory Compliance Risk*</b>                  |   | x |   |   |   |   |   |   |   |    | x  |    | x  | x  |    |    | 4  |
| <b>Imperfect Contract*</b>                          |   |   | x |   |   | x | x |   |   |    | x  |    |    |    |    |    | 4  |
| <b>Imperfect Specification *</b>                    |   |   |   | x |   |   |   |   | x |    |    |    |    |    |    |    | 2  |
| <b>Change in Law *</b>                              | x | x |   | x |   | x |   |   | x | x  |    | x  | x  |    | x  |    | 9  |
| <b>Court Order/Injunction*</b>                      |   |   |   |   |   |   |   |   |   |    |    |    | x  |    |    |    | 1  |
| <b>Major Changes*</b>                               |   |   |   |   |   | x | x | x |   |    |    | x  | x  | x  |    |    | 6  |
| <b>Disputes and Litigations*</b>                    |   |   |   |   |   |   |   |   | x |    | x  |    |    | x  |    |    | 3  |
| <b>Contracting Authority Status Change *</b>        |   |   |   |   |   |   |   |   |   |    |    |    |    |    |    | x  | 1  |
| Private Partner Ownership Structure Change          |   |   |   |   |   | x |   |   |   |    |    |    |    | x  |    |    | 2  |

|                                           |   |   |   |   |   |   |   |   |   |    |    |    |    |    |    |    |   |    |
|-------------------------------------------|---|---|---|---|---|---|---|---|---|----|----|----|----|----|----|----|---|----|
| Intellectual Property Infringement        |   |   |   |   |   |   |   |   |   |    |    |    |    |    | x  |    |   | 1  |
| Contrating Authority Step-in *            |   |   |   |   |   |   |   |   |   |    |    |    |    |    | x  |    |   | 1  |
| Abandonment of Project *                  |   |   |   |   |   | x |   |   | x |    |    |    |    |    |    |    |   | 2  |
| Contract Renegotiation Risk*              |   |   |   |   |   |   |   |   |   |    |    |    |    |    |    |    | x | 1  |
| Contract Termination *                    |   |   |   | x |   |   |   |   |   |    | x  |    | x  | x  |    |    |   | 4  |
| -GOVERNANCE RISKS-                        | 1 | 2 | 3 | 4 | 5 | 6 | 7 | 8 | 9 | 10 | 11 | 12 | 13 | 14 | 15 | 16 | # |    |
| Feasibility Risks*                        |   |   |   |   | x | x |   |   |   |    |    |    |    |    |    |    |   | 2  |
| Non-competitive Tender *                  |   |   |   |   | x | x | x |   |   |    |    |    |    |    |    |    |   | 3  |
| Non-transparent Tender (Corruption)*      |   |   |   |   | x | x | x | x |   |    | x  | x  |    |    |    | x  |   | 7  |
| Public Investment Framework Risks*        |   |   |   |   | x |   |   |   |   |    |    |    |    |    |    |    |   | 1  |
| Non Committed Public Party *              |   | x |   |   | x |   |   | x |   |    |    | x  |    |    |    | x  |   | 5  |
| Inefficient Political Decision System*    | x | x |   |   | x | x | x |   |   |    |    | x  |    |    |    | x  |   | 7  |
| Inefficient Approval Process *            |   |   |   |   |   |   |   |   |   |    |    | x  |    |    |    | x  |   | 2  |
| Hiding Contract Information from Society* |   |   |   |   |   |   |   |   |   |    |    |    |    |    |    |    | x | 1  |
| -POLITICAL RISKS-                         | 1 | 2 | 3 | 4 | 5 | 6 | 7 | 8 | 9 | 10 | 11 | 12 | 13 | 14 | 15 | 16 | # |    |
| Non-transparency During Project*          |   |   |   |   | x |   |   |   |   |    |    |    |    |    |    |    |   | 1  |
| Government Intervention *                 |   |   |   | x |   | x | x | x |   | x  | x  | x  | x  |    |    |    |   | 8  |
| Material Adverse Government Action *      |   |   |   |   |   |   |   |   |   |    |    |    |    |    | x  |    |   | 1  |
| Political Inconsistency *                 | x | x | x |   | x | x |   |   | x |    | x  | x  |    |    |    | x  |   | 9  |
| Compulsory Expropriation                  | x | x |   | x |   | x |   | x |   |    | x  |    | x  |    |    |    |   | 7  |
| Political Instability *                   |   | x |   |   |   |   |   | x |   |    | x  |    |    |    |    |    |   | 3  |
| Civil Commotion/Riot *                    |   |   |   |   |   |   |   |   |   |    |    |    | x  |    |    |    |   | 1  |
| War *                                     |   |   | x |   |   |   |   |   |   |    |    |    |    | x  | x  |    |   | 3  |
| Blockade *                                |   |   |   |   |   |   |   |   |   |    |    |    |    | x  |    |    |   | 1  |
| Militant Action/Terror *                  |   |   |   |   |   |   |   |   |   |    |    |    |    | x  | x  |    |   | 2  |
| -SOCIAL RISKS-                            | 1 | 2 | 3 | 4 | 5 | 6 | 7 | 8 | 9 | 10 | 11 | 12 | 13 | 14 | 15 | 16 | # |    |
| Negative Impact (Society/Business World)* |   |   |   |   |   |   |   |   |   |    |    |    |    |    | x  |    |   | 1  |
| Social Opposition                         | x | x |   |   |   |   |   | x |   |    |    |    |    |    | x  |    |   | 4  |
| Local People-Related Risks*               |   |   |   |   |   |   |   |   |   |    |    |    |    |    | x  |    |   | 1  |
| Relocation Risk *                         |   |   |   |   |   |   |   |   |   | x  |    |    |    |    | x  |    |   | 2  |
| Strike                                    |   |   |   |   |   |   |   |   |   |    |    |    |    |    |    | x  |   | 1  |
| -DESIGN RISKS-                            | 1 | 2 | 3 | 4 | 5 | 6 | 7 | 8 | 9 | 10 | 11 | 12 | 13 | 14 | 15 | 16 | # |    |
| Design Delay                              |   | x | x |   |   |   |   |   |   |    |    |    |    |    |    |    |   | 2  |
| Design Approval Risks*                    |   | x |   |   |   |   |   |   |   |    |    |    |    |    | x  |    |   | 2  |
| Design Deficiency/Unsuitability *         | x | x | x | x |   |   |   | x |   | x  | x  | x  | x  | x  |    |    |   | 10 |
| Design Change *                           | x | x |   |   |   |   |   |   |   |    |    |    |    |    | x  |    |   | 3  |
| -ENVIRONMENT & FORCE MAJEURE-             | 1 | 2 | 3 | 4 | 5 | 6 | 7 | 8 | 9 | 10 | 11 | 12 | 13 | 14 | 15 | 16 | # |    |
| Incompatibility with Standards*           |   |   |   |   | x |   |   |   |   |    |    |    |    |    |    |    |   | 1  |
| Environmental Approvals Related Risks*    |   |   |   |   |   |   |   |   |   |    |    |    |    |    | x  |    |   | 1  |
| Environmental Harm*                       |   |   |   |   |   | x |   | x | x |    |    | x  |    |    |    | x  |   | 5  |
| Environmental Event                       | x | x | x |   |   | x |   | x |   |    |    | x  |    |    | x  | x  |   | 8  |
| Force Majeure *                           |   | x | x | x |   | x |   | x | x | x  | x  | x  | x  |    |    | x  |   | 11 |
| -CONSTRUCTION RISKS-                      | 1 | 2 | 3 | 4 | 5 | 6 | 7 | 8 | 9 | 10 | 11 | 12 | 13 | 14 | 15 | 16 | # |    |
| Long Time Delay at Project Start          |   |   |   |   |   |   |   |   |   |    |    |    |    |    |    |    | x | 1  |
| Long Time Stop During Project*            |   |   |   |   |   |   |   |   |   |    |    |    |    |    |    |    | x | 1  |
| Cost Increase*                            | x | x |   | x |   |   |   | x | x | x  | x  | x  |    |    | x  | x  |   | 10 |

|                                         |   |   |   |   |   |   |   |   |   |    |    |    |    |    |    |    |    |   |
|-----------------------------------------|---|---|---|---|---|---|---|---|---|----|----|----|----|----|----|----|----|---|
| Delay Risk*                             | x | x |   | x |   |   |   |   | x | x  | x  | x  | x  |    | x  |    |    | 9 |
| Performance Risk*                       |   |   |   |   |   |   |   |   |   | x  |    |    |    |    |    |    |    | 1 |
| Incompatibility with Standards *        |   |   |   |   |   |   |   |   | x | x  |    |    |    |    |    |    |    | 2 |
| Defects *                               |   |   |   | x |   |   |   |   | x |    |    |    |    |    | x  |    |    | 3 |
| Material/Input Risks (Quantity Related) | x | x |   |   |   | x |   | x | x |    |    |    | x  |    |    |    |    | 6 |
| Material/Input Risks (Quality Related)  |   | x | x |   |   | x |   | x | x |    |    |    | x  |    |    |    |    | 6 |
| Material/Input Risks (Time Related)     |   | x |   |   |   | x |   | x | x |    |    |    | x  |    |    |    |    | 5 |
| Restriction on Import/Export            |   |   |   | x |   |   |   |   |   |    |    |    |    |    |    |    |    | 1 |
| Construction Material Price Change *    |   |   |   | x |   | x | x |   | x |    |    |    |    |    |    |    |    | 4 |
| Inadequate Human Resource               | x | x |   |   |   |   |   |   |   |    |    |    |    |    |    |    |    | 2 |
| Inadequate Labor                        | x | x | x |   |   | x |   | x | x |    |    |    | x  |    |    |    |    | 7 |
| Severe Changes in Labor Costs*          |   |   |   |   |   |   |   |   |   |    |    |    |    |    |    |    | x  | 1 |
| Technology Risks                        |   |   |   |   | x |   |   |   | x |    |    | x  | x  |    | x  |    |    | 5 |
| Inexperienced Stakeholders              | x | x |   |   |   | x |   | x |   |    |    | x  | x  |    |    |    |    | 6 |
| Imperfect Supervision*                  |   |   |   |   |   | x | x |   |   |    |    |    |    |    |    |    |    | 2 |
| Organization/Coordination Risk          | x | x |   |   |   | x |   | x |   |    |    |    |    |    |    | x  |    | 5 |
| Private Partner Insolvency *            |   |   |   |   |   |   |   |   |   |    |    |    |    |    | x  |    |    | 1 |
| Subcontractor Insolvency                |   | x | x |   |   |   |   |   |   |    |    |    |    |    | x  |    |    | 3 |
| Interface Risk (Construction)           |   |   |   |   |   |   |   |   |   |    |    |    |    |    | x  |    |    | 1 |
| Health and Safety Risk (Construction)   |   |   |   |   |   |   |   | x |   |    |    |    |    |    | x  |    |    | 2 |
| Vandal Actions (Construction)           |   |   |   |   |   |   |   |   |   |    |    |    |    |    | x  |    |    | 1 |
| -OPERATIONAL & TRANSFER RISKS-          | 1 | 2 | 3 | 4 | 5 | 6 | 7 | 8 | 9 | 10 | 11 | 12 | 13 | 14 | 15 | 16 | #  |   |
| Low Demand*                             | x | x | x | x |   | x | x | x |   | x  | x  | x  |    | x  | x  |    | 12 |   |
| High Demand *                           | x |   | x |   |   | x | x | x |   | x  | x  | x  |    | x  | x  |    | 10 |   |
| Monopoly Risk                           |   |   |   |   |   |   |   |   |   |    |    |    |    |    |    | x  | 1  |   |
| Insufficient Income Risk                |   |   |   |   |   |   |   |   |   |    |    |    |    |    |    | x  | 1  |   |
| Competition Risk (Competitive Projects) |   | x | x |   |   | x |   |   | x |    |    |    | x  |    | x  |    | 6  |   |
| Tariff Protest                          |   |   |   |   |   |   |   |   |   |    |    |    | x  |    |    |    | 1  |   |
| Tariff Change *                         |   |   |   |   |   |   |   |   |   | x  | x  | x  |    |    | x  |    | 4  |   |
| Operational Material Risks              |   |   |   |   |   |   |   |   |   |    |    |    |    |    | x  |    | 1  |   |
| Operational Labor Risks                 |   |   |   |   |   |   |   |   |   |    |    |    |    |    | x  |    | 1  |   |
| Operational Human Resource Risks        |   |   |   |   |   |   |   |   |   |    |    |    |    |    | x  |    | 1  |   |
| Operational Cost Increase               | x | x |   |   |   | x | x | x |   | x  | x  | x  |    | x  |    |    | 9  |   |
| Operational Performance Quality Risks*  |   |   |   | x |   |   |   | x |   | x  | x  |    |    | x  |    |    | 5  |   |
| Operational Interruption                |   |   |   | x |   |   |   |   |   | x  |    |    |    |    |    |    | 2  |   |
| Operational Resource Supply Risk        |   |   |   |   |   |   |   |   |   |    |    |    |    |    | x  |    | 1  |   |
| Maintenance Risks *                     | x | x |   |   |   |   |   | x |   |    |    |    | x  |    |    |    | 4  |   |
| Health and Safety Risk (Operation)      |   |   |   | x |   |   |   |   |   |    |    |    |    |    |    |    | 1  |   |
| Interface Risk (Operation) *            |   |   |   |   |   |   |   |   |   |    |    |    |    |    | x  |    | 1  |   |
| Vandal Actions (Operation)              |   |   |   |   |   |   |   |   |   |    |    |    |    |    | x  |    | 1  |   |
| Embargo *                               |   |   |   |   |   |   |   |   |   |    |    |    | x  | x  |    |    | 2  |   |
| Facility Condition Risk During Transfer |   |   |   |   |   |   |   |   | x |    |    |    |    |    | x  |    | 2  |   |

<sup>1</sup>Bing et al. (2005); <sup>2</sup> Ibrahim et al. (2006); <sup>3</sup>Abednego and Ogunlana (2006); <sup>4</sup>Ng and Loosemore (2007); <sup>5</sup>Zou et al. (2008); <sup>6</sup>Xu et al. (2010); <sup>7</sup>Cheung and Chan (2011); <sup>8</sup>Hwang et al. (2013); <sup>9</sup>Wojewnik-Filipkowska and Trojanowski (2013); <sup>10</sup>Carbonara et al. (2015); <sup>11</sup>Ameyaw and Chan (2015); <sup>12</sup>Osei-Kyei and Chan (2017); <sup>13</sup>Opawole and Jagboro (2018); <sup>14</sup>GI HUB (2019); <sup>15</sup>Wang et al. (2020) <sup>16</sup> Additional risk factors identified during expert validation via Delphi Technique

## References for Supplementary Material B

- [95] <sup>1</sup>Bing, L.; Akintoye, A.; Edwards, P. J.; Hardcastle, C. The allocation of risk in PPP/PFI construction projects in the UK. *Int. J. Proj. Manag.* **2005**, *23*, 25-35.
- [99] <sup>2</sup>Ibrahim, A. D.; Price, A. D. F.; Dainty, A. R. J. The analysis and allocation of risks in public private partnerships in infrastructure projects in Nigeria. *J. Financ. Manag. Prop. Constr.* **2006**, *11*, 149-164. <https://doi.org/10.1108/13664380680001086>
- [94] <sup>3</sup>Abednego, M. P.; Ogunlana, S. O. Good project governance for proper risk allocation in public-private partnerships in Indonesia. *Int. J. Proj. Manag.* **2006**, *24*, 622-634. <https://doi.org/10.1016/j.ijproman.2006.07.010>
- [100] <sup>4</sup>Ng, A.; Loosemore, M. (2007). Risk allocation in the private provision of public infrastructure. *Int. J. Proj. Manag.* **2007**, *25*, 66-76. <https://doi.org/10.1016/j.ijproman.2006.06.005>
- [104] <sup>5</sup>Zou, P. X.; Wang, S.; Fang, D. A life-cycle risk management framework for PPP infrastructure projects. *J. Financ. Manag. Prop. Constr.* **2008**, *13*, 123-142. <https://doi.org/10.1108/13664380810898131>
- [21] <sup>6</sup>Xu, Y.; Yeung, J. F.; Chan, A. P.; Chan, D. W.; Wang, S. Q.; Ke, Y. Developing a risk assessment model for PPP projects in China—A fuzzy synthetic evaluation approach. *Automat. Constr.* **2010**, *19*, 929-943. <https://doi.org/10.1016/j.autcon.2010.06.006>
- [97] <sup>7</sup>Cheung, E.; Chan, A. P. Risk factors of public-private partnership projects in China: Comparison between the water, power, and transportation sectors. *J. Urban Plan. and Dev.* **2011**, *137*, 409-415. [https://doi.org/10.1061/\(ASCE\)UP.1943-5444.0000086](https://doi.org/10.1061/(ASCE)UP.1943-5444.0000086)
- [98] <sup>8</sup>Hwang, B. G.; Zhao, X.; Gay, M. J. S. Public private partnership projects in Singapore: Factors, critical risks and preferred risk allocation from the perspective of contractors. *Int. J. Proj. Manag.* **2013**, *31*, 424-433. <https://doi.org/10.1016/j.ijproman.2012.08.003>
- [103] <sup>9</sup>Wojewnik-Filipkowska, A.; Trojanowski, D. Principles of public-private partnership financing—Polish experience. *J. Prop. Invest. Financ.* **2013**, *31*, 329-344. <https://doi.org/10.1108/JPIF-10-2012-0049>
- [96] <sup>10</sup>Carbonara, N.; Costantino, N.; Gunnigan, L.; Pellegrino, R. Risk management in motorway PPP projects: Empirical-based guidelines. *Transp. Rev.* **2015**, *35*, 162-182. <https://doi.org/10.1080/01441647.2015.1012696>
- [37] <sup>11</sup>Ameyaw, E. E.; Chan, A. P. Evaluating key risk factors for PPP water projects in Ghana: a Delphi study. *J. Facil. Manag.* **2015**, *13*, 133-155. <https://doi.org/10.1108/JFM-10-2013-0051>
- [39] <sup>12</sup>Osei-Kyei, R.; Chan, A. P. Risk assessment in public-private partnership infrastructure projects: Empirical comparison between Ghana and Hong Kong. *Constr. Innov.* **2017**, *17*, 204-223. <https://doi.org/10.1108/CI-08-2016-0043>
- [101] <sup>13</sup>Opawole, A.; Jagboro, G. O. Compensation mechanisms for minimizing private party risks in concession-based public-private partnership contracts. *Int. J. Build. Pathol. and Adapt.* **2018**, *36*, 93-120. <https://doi.org/10.1108/IJBPA-09-2017-0041>
- [16] <sup>14</sup>Global Infrastructure HUB & Allen & Overy. PPP Risk Allocation Tool. 2019. Available online: <https://ppp-risk.github.io/risk-allocation-matrix/transport/road/> (accessed on 15 January 2024).
- [102] <sup>15</sup>Wang, Y.; Wang, Y.; Wu, X.; Li, J. Exploring the risk factors of infrastructure PPP projects for sustainable delivery: A social network perspective. *Sustainability*. **2020**, *12*, 4152. <https://doi.org/10.3390/su12104152>

**SUPPLEMENTARY MATERIAL C – PPP Project Information Requirements Used in the Proposed Prototype (Adapted from Authors [93])**

**\* Project Information Requirements that are integrated into the model after expert validation via Delphi Technique**

| <b>-General Project Information-</b>              | <b>Source No and (Page)</b>      |
|---------------------------------------------------|----------------------------------|
| <b>Project Description and Scope*</b>             | 11(p.440)-13(p.84)               |
| <b>PPP Type*</b>                                  | 4(p.256)                         |
| <b>Public Party*</b>                              | 8(p.38)-12(p.6)                  |
| <b>Sponsor*</b>                                   | 8(p.38)-12(p.6)                  |
| <b>Lenders*</b>                                   | 3(p.6)-8(p.38)                   |
| Consultant                                        | 8(p.38)                          |
| Suppliers                                         | 12(p.6)                          |
| <b>Contractors*</b>                               | 12(p.6)                          |
| <b>Operator*</b>                                  | 12(p.6)                          |
| <b>Users*</b>                                     | 8(p.38)                          |
| Other Stakeholder (Unions, Media etc.)            | 8(p.38)-12(p.6)                  |
| <b>-Contract General Information-</b>             | <b>Source No and (Page)</b>      |
| <b>Bid Submission Date/Tender Date*</b>           | 1(p.272)-3(p.5)-6(p.22)          |
| <b>Implementation Contract Signing Date*</b>      | 14                               |
| <b>Contract Effective Date*</b>                   | 14                               |
| <b>Contract Type*</b>                             | 1(p.272)-6(p.20)                 |
| <b>Construction Period*</b>                       | 4(p.256)-6(p.222)-10(p.143)      |
| <b>Operation Period*</b>                          | 14                               |
| <b>Concession Period*</b>                         | 4(p.256)-6(p.222)-10(p.143)      |
| <b>Repayment Period*</b>                          | 1(p.236)-7(p.253)                |
| <b>Expiry Date*</b>                               | 2(p.2)-3(p.10)                   |
| <b>-Finance and Insurance and Warranties-</b>     | <b>Source Numbers and (Page)</b> |
| <b>Currency*</b>                                  | 3(p.9)-6(p.253)                  |
| <b>Private Party Shareholders Percentages*</b>    | 14                               |
| Equity/Debt Ratio                                 | 5(p.31)                          |
| <b>Loan Financing*</b>                            | 1(p.272)                         |
| <b>Repayment Program/plan*</b>                    | 14                               |
| Recourse-non Recourse                             | 1(p.228)                         |
| <b>Insurance*</b>                                 | 2(p.19)-3(p.80)-4(256)-10(p.143) |
| <b>Escrow*</b>                                    | 1(p.136)-6(213)                  |
| <b>Contingency*</b>                               | 6(214)                           |
| <b>Guarantees, Warranties, Performance Bonds*</b> | 6(214)                           |
| <b>-Legal and Technic-</b>                        | <b>Source No and (Page)</b>      |
| <b>Laws*</b>                                      | 2(p.10)-3(p.10)                  |
| <b>Regulations*</b>                               | 3(p.10)                          |
| <b>Permits, Consents, License*</b>                | 2(p.10)-3(p.19)                  |
| <b>Quality standards*</b>                         | 3(Annex 12)                      |
| <b>Specifications*</b>                            | 2(p.10)-3(Annex 13)              |
| <b>Guidelines*</b>                                | 14                               |
| <b>Intellectual Property Rights *</b>             | 2(p.38)-3(p.95)                  |
| <b>-Project General Analysis-</b>                 | <b>Source No and (Page)</b>      |
| <b>Value Proposition*</b>                         | 13(p.252)                        |
| <b>Milestones*</b>                                | 13(p.241)                        |
| <b>Success Criteria*</b>                          | 13(p.96)                         |
| <b>Boundaries/Constraints*</b>                    | 11(p.440)-13(p.174)              |
| <b>Assumptions*</b>                               | 11(p.440)-13(p.174)              |
| <b>Strengths*</b>                                 | 11(p.394)-13(p.177)              |
| <b>Weaknesses*</b>                                | 11(p.394)-13(p.177)              |
| Opportunities                                     | 11(p.394)-13(p.177)              |
| <b>Threats*</b>                                   | 11(p.394)-13(p.177)              |
| <b>-Mechanisms and Provisions-</b>                | <b>Source No and (Page)</b>      |
| <b>Rate/Tariff Adjustment Mechanism*</b>          | 5(p.31)-10(p.143)                |
| <b>Revenue sharing mechanism*</b>                 | 14                               |
| <b>Exclusivity Provisions*</b>                    | 3(p.23)                          |
| <b>Compensation Cases*</b>                        | 2(p.50)-6(p.198)-9(p.64)         |
| <b>Relief Events*</b>                             | 2(p.29)-6(p.198)-9(p.17)         |

|                                                                                                                                                                                                                                                                                                                                                                                                                                                                                                                                                                                                                                   |                                  |
|-----------------------------------------------------------------------------------------------------------------------------------------------------------------------------------------------------------------------------------------------------------------------------------------------------------------------------------------------------------------------------------------------------------------------------------------------------------------------------------------------------------------------------------------------------------------------------------------------------------------------------------|----------------------------------|
| <b>Force Majeure*</b>                                                                                                                                                                                                                                                                                                                                                                                                                                                                                                                                                                                                             | 2(p.31)-3(p.83)-6(p.224)-9(p.15) |
| <b>Extension of Time Conditions*</b>                                                                                                                                                                                                                                                                                                                                                                                                                                                                                                                                                                                              | 2(p.3)-3(p.40)-9(p.23)           |
| <b>Dispute Resolution Mechanisms*</b>                                                                                                                                                                                                                                                                                                                                                                                                                                                                                                                                                                                             | 2(p.53)-3(p.99)-9(p.107)         |
| <b>Early Termination Provisions*</b>                                                                                                                                                                                                                                                                                                                                                                                                                                                                                                                                                                                              | 2(p.50)-3(p.85-87)-9(p.24)       |
| <b>Early Termination Payments*</b>                                                                                                                                                                                                                                                                                                                                                                                                                                                                                                                                                                                                | 2(p.50)-3(p.89)-6(230)-9(p.61)   |
| <b>Handback requirements*</b>                                                                                                                                                                                                                                                                                                                                                                                                                                                                                                                                                                                                     | 14                               |
| <b>Defects Liability Period Provisions*</b>                                                                                                                                                                                                                                                                                                                                                                                                                                                                                                                                                                                       | 3(p.7)-6(p.198)                  |
| Sources; <sup>1</sup> Akintoye et al. (2003), <sup>2</sup> Fort St. John Hosp. Agreement (2009), <sup>3</sup> Kosovo Airport PPP Contract (2010), <sup>4</sup> Yuan et al. (2012), <sup>5</sup> Ogunsanmi (2013), <sup>6</sup> Boussabaine (2013), <sup>7</sup> Chen et al. (2015), <sup>8</sup> APMG (2016), <sup>9</sup> IBRD and Worldbank (2017), <sup>10</sup> Mohamad et al. (2018), <sup>11</sup> Richards (2018), <sup>12</sup> Wojewnik-Filipkowska and Węgrzyn (2019), <sup>13</sup> PMBOK 7th (2021) <sup>14</sup> <b>Additional information requirements identified during expert validation via Delphi Technique</b> |                                  |

### References for Supplementary Material C

- [106] <sup>1</sup>Akintoye, A.; Beck, M.; Hardcastle, C. *Public-private partnerships: managing risks and opportunities*; John Wiley & Sons: United Kingdom, 2008
- [109] <sup>2</sup>Fort St. John Hospital Project Agreement. Northern Health Authority and ISL Health (FSJ) General Partnership. 2009. Available online: <https://www.infrastructurebc.com/pdf/Fort-St-John-Hospital/fsjh-proj-agrmt.pdf>
- [111] <sup>3</sup>Kosovo Pristine International Airport PPP Contract. 2010. Available online: <https://www.pppkosova.org/repository/docs/PPP%20PIA%20Agreement%20Web.pdf> (accessed on 20 March 2023) [https://drive.google.com/file/d/1hopvor\\_CH9aX\\_O1XU\\_4vrkqiCiIaZv\\_o/view?usp=sharing](https://drive.google.com/file/d/1hopvor_CH9aX_O1XU_4vrkqiCiIaZv_o/view?usp=sharing)
- [114] <sup>4</sup>Yuan, J.; Wang, C.; Skibniewski, M. J.; Li, Q. Developing key performance indicators for public-private partnership projects: questionnaire survey and analysis. *J. Manag. in Eng.* **2012**, *28*, 252-264. [https://doi.org/10.1061/\(ASCE\)ME.1943-5479.0000113](https://doi.org/10.1061/(ASCE)ME.1943-5479.0000113)
- [113] <sup>5</sup>Ogunsanmi, O. E. Stakeholders' perception of key performance indicators (KPIs) of public-private partnership (PPP) projects. *Int. J. Constr. Supply Chain Manag.* **2013**, *3* 27-38.
- [107] <sup>6</sup>Boussabaine, A. *Risk pricing strategies for public-private partnership projects (Vol. 4)*. John Wiley & Sons, 2013.
- [108] <sup>7</sup>Chen, B.; Mao, C. K.; Hu, J. L. (2015). The optimal debt ratio of public-private partnership projects. *Int. J. Constr. Manag.* **2015**, *15*, 239-253. <https://doi.org/10.1080/15623599.2015.1062217>
- [33] <sup>8</sup>ADB; EBRD; IDB; IsDB; WBG. *The APMG Public-Private Partnership (PPP) Certification Guide*; World Bank Group: Washington, DC, USA, 2016.
- [110] <sup>9</sup>IBRD (International Bank for Reconstruction and Development) and Worldbank. *Guidance on PPP Contractual Provisions*; World Bank: Washington, DC, 2017.
- [112] <sup>10</sup>Mohamad, R.; Ismail, S.; Mohd Said, J. Performance indicators for public private partnership (PPP) projects in Malaysia. *J. Econ. Administrative Sci.* **2018**, *34*, 137-152. <https://doi.org/10.1108/JEAS-04-2017-0018>
- [61] <sup>11</sup>Richards, K. *Prince2 Agile*. 3 ed.; The Stationery Office: London, UK, 2018.
- [134] <sup>12</sup>Wojewnik-Filipkowska, A.; Węgrzyn, J. Understanding of public-private partnership stakeholders as a condition of sustainable development. *Sustainability*. **2019**, *11*, 1194. <https://doi.org/10.3390/su11041194>
- [62] <sup>13</sup>PMI (Project Management Institute). *A Guide to the Project Management Body of Knowledge (PMBOK Guide)*, 7th ed.; Project Management Institute: Newtown Square, PA, USA, 2021.

## SUPPLEMENTARY MATERIAL D – PPP Financial Information Requirements Used in the Proposed Prototype (Adapted from Authors [93])

\* Financial Information Requirements that are integrated into the model after expert validation via Delphi Technique

| Financial Information Requirements                                                                                                                                                                                        | 1 | 2 | 3 | 4 | 5 | 6 |
|---------------------------------------------------------------------------------------------------------------------------------------------------------------------------------------------------------------------------|---|---|---|---|---|---|
| Demand Projection*                                                                                                                                                                                                        | X | X | X |   | X | X |
| Tariff/Toll Level*                                                                                                                                                                                                        | X | X | X | X | X | X |
| Initial Working Capital*                                                                                                                                                                                                  | X | X |   | X | X |   |
| Amount (Loan)*                                                                                                                                                                                                            | X | X | X |   | X | X |
| Maturity*                                                                                                                                                                                                                 | X | X | X | X |   |   |
| Debt/Equity*                                                                                                                                                                                                              |   | X | X | X |   |   |
| Inflation*                                                                                                                                                                                                                | X | X | X | X |   | X |
| Interest Rate*                                                                                                                                                                                                            | X | X | X | X | X | X |
| Exchange Rate*                                                                                                                                                                                                            | X | X | X | X | X | X |
| Project Costs*                                                                                                                                                                                                            | X | X | X | X | X |   |
| Financing Cost*                                                                                                                                                                                                           | X | X | X | X | X | X |
| Construction Cost*                                                                                                                                                                                                        | X | X | X | X | X | X |
| Operational Cost*                                                                                                                                                                                                         | X | X | X | X | X | X |
| Maintenance Cost*                                                                                                                                                                                                         | X | X | X | X | X | X |
| Tax*                                                                                                                                                                                                                      | X | X | X | X | X | X |
| Depreciation*                                                                                                                                                                                                             |   | X | X |   |   | X |
| CAPEX*                                                                                                                                                                                                                    | X | X | X | X |   | X |
| Contingent Liabilities*                                                                                                                                                                                                   | X |   | X |   |   | X |
| Contingency Funding*                                                                                                                                                                                                      | X | X | X | X |   |   |
| Revenue*                                                                                                                                                                                                                  | X | X | X | X | X | X |
| CFADS (Cash flow for debt service)*                                                                                                                                                                                       |   | X | X | X | X | X |
| Net Cash Flow*                                                                                                                                                                                                            | X | X | X | X | X | X |
| EBITDA *                                                                                                                                                                                                                  |   | X | X |   | X | X |
| NPV (Net Present Value)*                                                                                                                                                                                                  | X | X | X | X | X | X |
| IRR (Internal Rate of Return)*                                                                                                                                                                                            | X | X | X | X | X | X |
| ROI (Return on Investment)                                                                                                                                                                                                | X | X | X | X |   |   |
| ROE (Return on Equity)*                                                                                                                                                                                                   | X | X | X | X | X |   |
| WACC (Weighted Average of Cost of Capital)                                                                                                                                                                                | X | X | X | X |   |   |
| Interest Covering Ratio*                                                                                                                                                                                                  |   | X |   |   | X |   |
| DSCR (Debt Service Cover Ratio)*                                                                                                                                                                                          | X |   | X | X | X |   |
| ADSCR (Annual Debt Service Cover Ratio)*                                                                                                                                                                                  | X | X | X | X |   |   |
| LLCR (Loan Life Cover Ratio)*                                                                                                                                                                                             | X | X | X | X | X |   |
| PLCR (Project Life Coverage Ratio)*                                                                                                                                                                                       | X | X | X | X |   |   |
| References; <sup>1</sup> Grimsey and Lewis (2004), <sup>2</sup> Yescombe (2007), <sup>3</sup> PPIAF (2009), <sup>4</sup> Boussabaine (2014), <sup>5</sup> Kurniawan et al. (2015), <sup>6</sup> IMF and World Bank (2022) |   |   |   |   |   |   |

### References for Supplementary Material D

- [63] <sup>1</sup>Grimsey, D.; Lewis, M.K. *PPP-The Worldwide Revolution in Infrastructure Provision and Project Finance*; Edward Elgar Publishing Limited: Cheltenham, UK, 2004.
- [117] <sup>2</sup>Yescombe, E. R. (2011). *Public-private partnerships: principles of policy and finance*. Elsevier, 2011.
- [116] <sup>3</sup>PPIAF (Public-Private Infrastructure Advisory Facility). Toolkit for Public-Private Partnerships in Roads&Highways. 2009. Available online: [https://www.ppiaf.org/sites/ppiaf.org/files/documents/toolkits/highwaystoolkit/6/toolkit\\_files/index.html](https://www.ppiaf.org/sites/ppiaf.org/files/documents/toolkits/highwaystoolkit/6/toolkit_files/index.html) (accessed on 20 September 2023)
- [107] <sup>4</sup>Boussabaine, A. *Risk pricing strategies for public-private partnership projects (Vol. 4)*. John Wiley & Sons, 2013.
- [115] <sup>5</sup>Kurniawan, F.; Mudjanarko, S. W.; Ogunlana, S. Best practice for financial models of PPP projects. *Proc. Eng.*. **2015**, 125, 124-132. <https://doi.org/10.1016/j.proeng.2015.11.019>
- [43] <sup>6</sup>IMF; World Bank Group. PFRAM Public-Private Partnerships Fiscal Risk Assessment Model Version 2; International Monetary Fund and World Bank: Washington, DC, USA, 2022.



**SUPPLEMENTARY MATERIAL E - Expert Profile Participated in the Delphi Study Conducted for Risk Factors Determination - Adapted from Authors [92]**

| <b>Experts</b> | <b>PPP Experience</b> | <b>Number of PPP Projects</b> |
|----------------|-----------------------|-------------------------------|
| Expert 1       | 7                     | 4                             |
| Expert 2       | 20                    | 20                            |
| Expert 3       | 6                     | 7                             |
| Expert 4       | 5                     | 8                             |
| Expert 5       | 12                    | 15                            |
| Expert 6       | 25                    | 20                            |
| Expert 7       | 25                    | 50                            |
| Expert 8       | 7                     | 11                            |
| Expert 9       | 8                     | 8                             |
| Expert 10      | 5                     | 10                            |
| Expert 11      | 10                    | 5                             |
| Expert 12      | 20                    | 15                            |
| Expert 13      | 10                    | 50                            |
| Average        | >12                   | >17                           |

**SUPPLEMENTARY MATERIAL F – Expert Profile Participated in the Delphi Study Conducted for Information Requirements Determination (Adapted from Authors [93])**

| <b>Experts</b> | <b>PPP Experience</b> | <b>Number of PPP Projects</b> |
|----------------|-----------------------|-------------------------------|
| Expert 1       | 20                    | 20                            |
| Expert 2       | 9                     | 7                             |
| Expert 3       | 3                     | 4                             |
| Expert 4       | 17                    | 40                            |
| Expert 5       | 13                    | Not Stated                    |
| Expert 6       | 15                    | 20                            |
| Expert 7       | 10                    | 10                            |
| Expert 8       | 5                     | 3                             |
| Expert 9       | Not Stated            | Not Stated                    |
| Expert 10      | 10                    | 5                             |
| Expert 11      | 12                    | 5                             |
| Expert 12      | 15                    | 30                            |
| Average        | >11                   | >14                           |

\*"Not stated" cells not included in the average

SUPPLEMENTARY MATERIAL G – Expert Profile Participated in the Verification and Validation of the Proposed Prototype

|                                                       | P1         | P2                | P3              | P4                        | P5                | P6                  | P7                     | P8                       | P9                  | P10        | P11                      | P12                 | P13          | P14                    | P15             | P16             | P17        | P18         | P19                    | P20         | P21         |
|-------------------------------------------------------|------------|-------------------|-----------------|---------------------------|-------------------|---------------------|------------------------|--------------------------|---------------------|------------|--------------------------|---------------------|--------------|------------------------|-----------------|-----------------|------------|-------------|------------------------|-------------|-------------|
|                                                       | Consultant | Consultant        | Senior Engineer | Senior Project Consultant | Planning Engineer | Contract Consultant | Deputy Project Manager | Senior Planning Engineer | Contract Consultant | Consultant | Senior Planning Engineer | Contract Consultant | Consultant   | Senior Project Manager | Project Manager | Senior Engineer | Consultant | Academician | Senior Project Manager | Academician | Academician |
| Total PPP Experience (Year)                           | 20         | 11                | 5               | 6                         | 4                 | 30                  | 9                      | 5                        | 25                  | 20         | 3                        | 27                  | 28           | -                      | 32              | -               | 20         | -           | 6                      | 23          | -           |
| Number of PPP Project Experience                      | 50         | 15                | 2               | 20                        | 1                 | 10                  | 2                      | 1                        | 4                   | 15         | 2                        | 12                  | 13           | -                      | 1               | -               | 3          | -           | 1                      | 2           | -           |
| Experience based on the PPP Sector                    | Energy     | Road Energy       | Hospital        | Health Road               | Hospital          | Health Road         | Hospital               | Hospital                 | Road Airport        | Energy     | Hospital Rail            | Road                | Road Airport | Airport                | Road            | Health Airport  | Road       | Academic    | Hospital               | Road        | Academic    |
| Experience based on PPP Type                          | BOT        | BOT Privatization | BOT             | BOT                       | BOT               | BOT                 | BLT                    | BOT                      | BOT                 | BOT        | BOT                      | BOT-BLT             | BOT-BLT      | -                      | BOT             | -               | BOT        | -           | BOT                    | BOT         | -           |
| Expertise area (a-PPP, b-Risk management, c-Contract) | a-b-c      | a-c               | a-b-c           | a-b                       | a-b               | a-c                 | a-b-c                  | a-c                      | a-b-c               | a-b-c      | a                        | a-c                 | a-b          | b-c                    | a               | c               | a-b-c      | b-c         | a-c                    | a-b-c       | b-c         |

#### SUPPLEMENTARY MATERIAL H – Risk Register Items Explanations

|                                 |                                                                                                                                                                                                                                                       |
|---------------------------------|-------------------------------------------------------------------------------------------------------------------------------------------------------------------------------------------------------------------------------------------------------|
| <b>Risk ID:</b>                 | It is an identification code that the user assigns to recognize a risk. Numbers and letters can be used to create a Risk ID.                                                                                                                          |
| <b>Risk contract clause ID:</b> | It is the identification number of contract clauses that are related to the assessed risk. It is used to make associations between project risks and contracts.                                                                                       |
| <b>Category (Type):</b>         | The group where the risk is listed (e.g., Financial, Political, Social, etc.)                                                                                                                                                                         |
| <b>Project phase:</b>           | It is used to define in which project phases the risk can be seen. For instance, Revenue risk can be seen in the Operation phase. Assigning multiple project phases to risks is possible since some risks can be seen in more than one project phase. |
| <b>Description:</b>             | Detailed description of the risks and detailed explanation of the mechanisms used against the risks.                                                                                                                                                  |
| <b>Probability score:</b>       | The probability assessment of the risk on a 1-10 scale.                                                                                                                                                                                               |
| <b>Impact score:</b>            | The impact assessment of the risk on a 1-10 scale.                                                                                                                                                                                                    |
| <b>Probability x Impact:</b>    | It is the multiplication of the Probability and Impact scores.                                                                                                                                                                                        |
| <b>Impact type:</b>             | It defines the risk's impact kind on the project. For instance, Site Security risks can cause delays. Hence, the impact type of the Site Security risk is "Time Impact". It is possible to assign more than one impact type to a risk.                |
| <b>Risk cost impact:</b>        | It is the impact of a risk on the project in terms of cost.                                                                                                                                                                                           |
| <b>Risk time impact:</b>        | It is the impact of a risk on the project in terms of time.                                                                                                                                                                                           |
| <b>Strategy:</b>                | The applied strategy against the risks (e.g., Avoid, Accept, Share, Transfer, etc.)                                                                                                                                                                   |
| <b>Allocation:</b>              | The party in the project that undertakes the risk.                                                                                                                                                                                                    |
| <b>Risk owner:</b>              | The responsible person from the party undertaking the risk.                                                                                                                                                                                           |
| <b>Mitigation/Prevention:</b>   | Mechanisms and actions to prevent risks or to reduce the risk impact.                                                                                                                                                                                 |
| <b>Compensation:</b>            | Mechanisms and actions that will be applied when a risk event occurs (e.g., Monetary Compensation, Extension of Time)                                                                                                                                 |
| <b>Causal risk:</b>             | The risk or risks that cause the occurrence of another risk.                                                                                                                                                                                          |
| <b>Consequential risk:</b>      | The risk or risks occurring due to another risk.                                                                                                                                                                                                      |
| <b>Residual risk:</b>           | The risk or risks that remains even if mitigation actions are implemented.                                                                                                                                                                            |
| <b>Secondary risk:</b>          | The risk or risks that occur due to the applied risk mitigations.                                                                                                                                                                                     |
| <b>Author:</b>                  | The person filling in the details on the risk register.                                                                                                                                                                                               |
| <b>Risk entry date:</b>         | The date when the risk is added to the system. It is assigned by the system automatically.                                                                                                                                                            |
| <b>Risk revision date:</b>      | The date when a revision is made on the risk. It is assigned by the system automatically.                                                                                                                                                             |
| <b>Risk status:</b>             | It shows the current status of a risk and is used to monitor risks (e.g., Active, Closed, Waiting, etc.)                                                                                                                                              |
